# Supplementary material for: Deciphering the Structural Basis of Eukaryotic Protein Kinase Regulation
Source: PLoS Biol. 2013 Oct 15;11(10):e1001680. doi: 10.1371/journal.pbio.1001680 (PMC3797032; doi:10.1371/journal.pbio.1001680)
Supplement: Table S4 — Amino acid numbers of each R-spine and Shell residues for the representatives of each conformation. A list of the R-spine and Shell residues for PKA, AKT, Src, AMPK, and P38-MAPK. (PDF) [file pbio.1001680.s007.pdf]

|     | PKA  | AKT  | Src  | AMPK | P38-MAPK |
|-----|------|------|------|------|----------|
| RS0 | D220 | D332 | D444 | D213 | D205     |
| RS1 | Y164 | Y273 | H384 | H154 | H148     |
| RS2 | F185 | F294 | F405 | F175 | F169     |
| RS3 | L95  | L204 | M314 | L86  | L75      |
| RS4 | L106 | L215 | L325 | L97  | L86      |
| Sh1 | V104 | T213 | V323 | I95  | I84      |
| Sh2 | M120 | M229 | T338 | I111 | T106     |
| Sh3 | M118 | F227 | I336 | M109 | L104     |
